# Supplementary material for: VxOy@C catalyst prepared from biomass for hydroxylation of benzene to phenol with molecular oxygen
Source: Royal Society of Chemistry journal article supplement (doi:10.1039/c6ra28768a), 2017-01-01
Supplement: c6ra28768a1.pdf [file c6ra28768a1.pdf]

Supporting informations for

## $V_xO_y@C$ catalyst prepared from biomass for hydroxylation of benzene to phenol with molecular oxygen

Weitao Wang<sup>a\*</sup>, Leilei Shi<sup>a</sup>, Na Li<sup>a</sup> and Yangmin Ma<sup>a\*</sup>

<sup>a</sup> College of Chemistry & Chemical Engineering, Shaanxi University of Science & Technology, Xi'an, Shaanxi, 710021, China.

\*Corresponding author: wwt1806@163.com, mym63@sina.com.

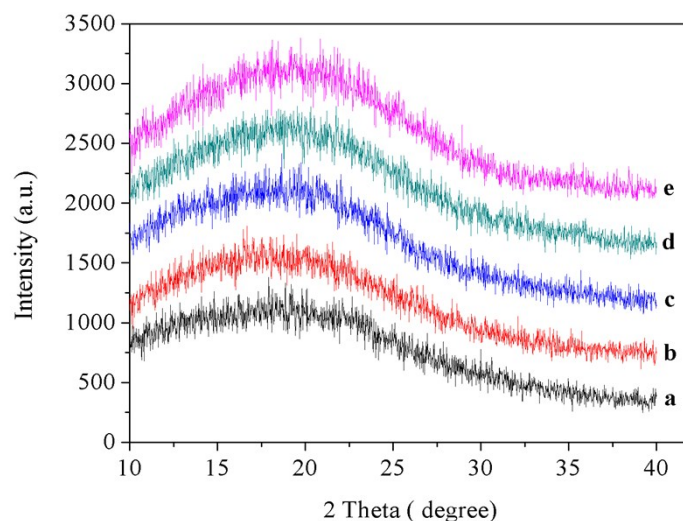

Fig.S1 XRD spectra of (a)  $V_xO_y@C-S$ , (b)  $V_xO_y@C-G$ , (c)  $V_xO_y@C-F$ , (d)  $V_xO_y@C-(F+G)$ , (e)  $V_xO_y@C-Vc$ .

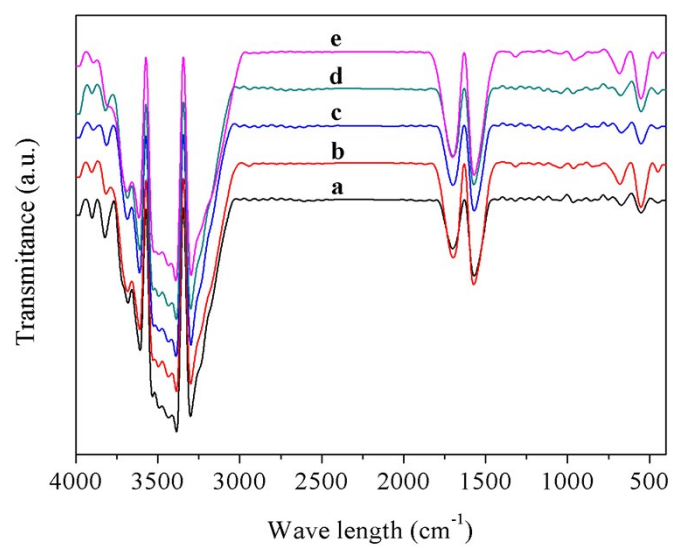

Fig. S2 FT-IR spectra of the catalysts. (a)  $V_xO_y@C-S$ , (b)  $V_xO_y@C-G$ , (c)  $V_xO_y@C-F$ , (d)  $V_xO_y@C-(F+G)$ , (e)  $V_xO_y@C-Vc$ .

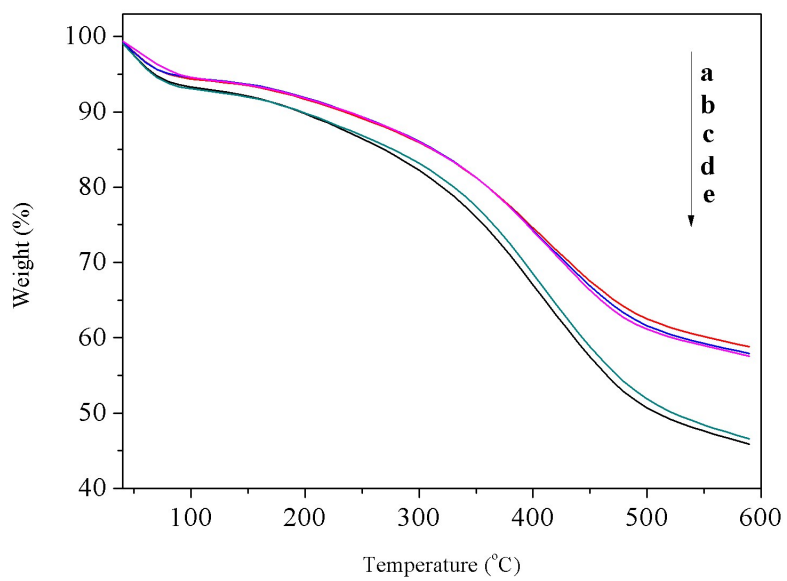

Fig. S3 TGA curves of the catalysts. (a) V<sub>x</sub>O<sub>y</sub>@C-G, (b) V<sub>x</sub>O<sub>y</sub>@C-F, (c) V<sub>x</sub>O<sub>y</sub>@C-Vc, (d) V<sub>x</sub>O<sub>y</sub>@C-(F+G), (e) V<sub>x</sub>O<sub>y</sub>@C-S.

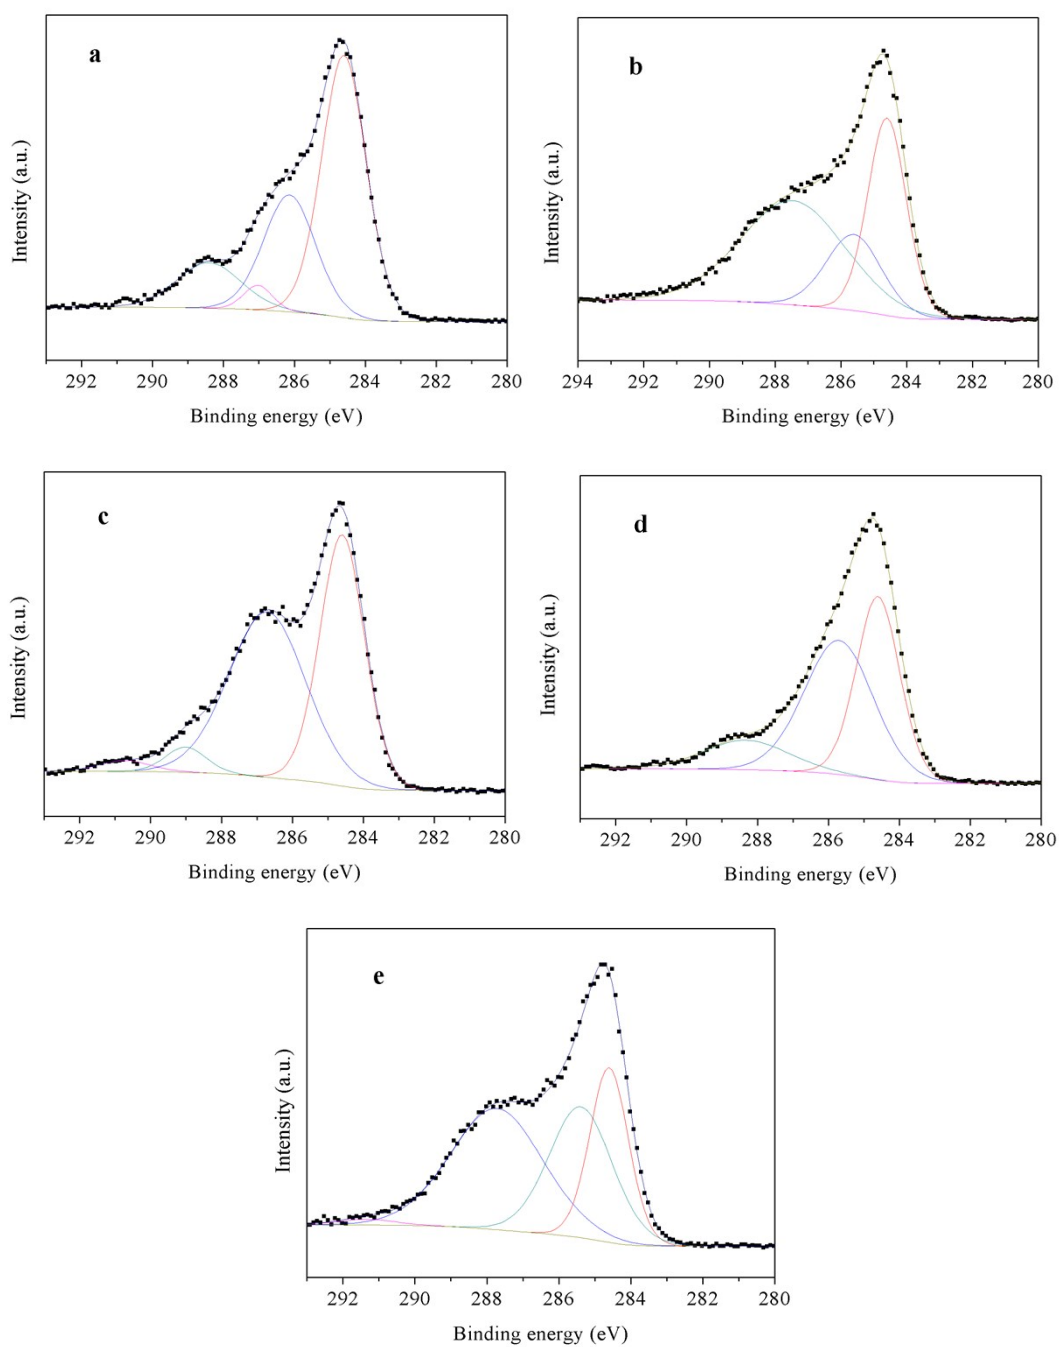

Fig. S4 C1s spectra of catalysts. (a)  $V_xO_y@C-S$ , (b)  $V_xO_y@C-G$ , (c)  $V_xO_y@C-F$ , (d)  $V_xO_y@C-(F+G)$ , (e)  $V_xO_y@C-Vc$ .

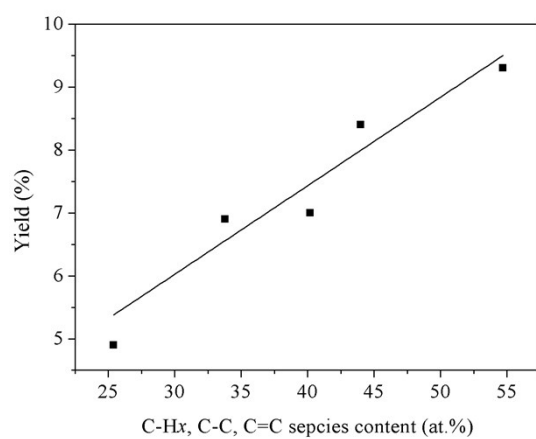

Fig. S5 The relationship between C1 species (C-H<sub>x</sub>, C-C, C=C) and yield of phenol.

Table S1 Summary of XPS V2p data of catalysts.

| Entry | Catalysts                              | V <sup>5+</sup>    | V <sup>4+</sup>    | V <sup>3+</sup>    |
|-------|----------------------------------------|--------------------|--------------------|--------------------|
| 1     | V <sub>x</sub> O <sub>y</sub> @C-S     | 517.40eV<br>7.76%  | 516.30eV<br>25.63% | 515.32eV<br>66.61% |
| 2     | V <sub>x</sub> O <sub>y</sub> @C-G     | —                  | 517.14eV<br>13.36% | 515.06eV<br>86.64% |
| 3     | V <sub>x</sub> O <sub>y</sub> @C-F     | 518.07eV<br>15.78% | —                  | 515.74eV<br>84.22% |
| 4     | V <sub>x</sub> O <sub>y</sub> @C-(F+G) | 517.47eV<br>32.59% | 516.02eV<br>43.25% | 514.43eV<br>24.45% |
| 5     | V <sub>x</sub> O <sub>y</sub> @C-Vc    | —                  | 516.96eV<br>58.93% | 514.95eV<br>41.07% |
